# Supplementary material for: Development and internal validation of a simple prognostic score for early sepsis risk stratification in the emergency department
Source: PubMed Central journal article supplement — BMJ Open. 2021 Jul 7;11(7):e046009. doi: 10.1136/bmjopen-2020-046009 (PMC8264891; doi:10.1136/bmjopen-2020-046009), 2021-07-07
Supplement: bmjopen-2020-046009supp002.pdf [file bmjopen-2020-046009supp002.pdf]

Table 1S. Clinical characteristics in patients with sepsis among development cohort and validation cohort.

| Variable                        | Development cohort | Validation cohort | P-value |
|---------------------------------|--------------------|-------------------|---------|
| Number of patients              |                    |                   |         |
| Age, y                          | 56.74±17.97        | 59.32±17.25       | 0.060   |
| Male, n (%)                     | 365(62.4%)         | 163(69.1%)        | 0.071   |
| Temperature, °C                 | 37.28±1.36         | 37.19±1.04        | 0.325   |
| Heart rate, beats/min           | 109.06±20.40       | 110.40±20.64      | 0.394   |
| Breathing rate, beats/min       | 23.62±5.30         | 23.78±5.12        | 0.681   |
| SBP, mmHg                       | 120.67±25.06       | 119.49±24.78      | 0.540   |
| DBP, mmHg                       | 73.36±17.26        | 73.08±15.85       | 0.834   |
| SPO <sub>2</sub> , %            | 93.72±7.17         | 93.33±8.53        | 0.502   |
| PH                              | 7.43±0.08          | 7.42±0.08         | 0.261   |
| PO <sub>2</sub> , mmHg          | 82.99±32.99        | 79.39±24.51       | 0.131   |
| PCO <sub>2</sub> , mmHg         | 33.86±10.46        | 34.05±11.61       | 0.819   |
| LACTATE, mmol/L                 | 1.99±1.63          | 2.20±1.99         | 0.105   |
| WBC,10 <sup>9</sup> /L          | 13.03±8.36         | 13.09±9.05        | 0.923   |
| Platelet,10 <sup>9</sup> /L     | 160 (92-244)       | 160(93-240)       | 0.714   |
| Hemoglobin ,g/L                 | 112.59±29.60       | 114.27±30.53      | 0.466   |
| HCT                             | 0.34±0.08          | 0.35±0.09         | 0.240   |
| Albumin ,g/L                    | 32.48±6.83         | 32.89±7.35        | 0.454   |
| Urea nitrogen, mmol/L           | 6.3(4.4-10.4)      | 6.7(4.5-10.8)     | 0.608   |
| Creatinine ,umol/L              | 78(59-121)         | 82(63-128)        | 0.763   |
| eGFR, mL/min/1.73m <sup>2</sup> | 100(61-177)        | 104(70-199)       | 0.681   |
| Cystatin-C, mg/L                | 1.50±1.20          | 1.53±1.20         | 0.752   |
| Fibrinogen, g/L                 | 4.42±1.72          | 4.28±1.57         | 0.282   |
| Total bilirubin, umol/L         | 12.3(8.2-21.3)     | 14.1(8.4-23.7)    | 0.826   |
| ALT, IU/L                       | 26(16-53)          | 29(15-63)         | 0.144   |
| AST, IU/L                       | 34(22-62)          | 35(22-76)         | 0.152   |
| Infection sites, n (%)          |                    |                   |         |
| Lung (pneumonia)                | 337(57.6%)         | 125(53.0%)        | 0.127   |
| Intra-abdominal site            | 134(22.9%)         | 70(29.7%)         |         |
| Others                          | 114(19.5%)         | 41(17.4%)         |         |
| 28-day mortality                | 125 (21.4%)        | 48 (20.3%)        | 0.744   |

SBP: systolic blood pressure; DBP: diastolic blood pressure; WBC: white blood cell; HCT: hematocrit; eGFR: estimated glomerular filtration rate; ALT: aspartate aminotransferase; AST: alanine aminotransferase.

Table 2S. Adverse outcome of sepsis patients categorized by simple sepsis early prognostic score among development cohort.

| Variable               | Simple sepsis early prognostic score |            |           | P      |
|------------------------|--------------------------------------|------------|-----------|--------|
|                        | T1 (n=329)                           | T2 (n=213) | T3 (n=43) |        |
| ICU admissions         | 97(29.5%)                            | 112(52.6%) | 33(76.7%) | <0.001 |
| Mechanical ventilation | 100(30.4%)                           | 113(53.1%) | 37(86.0%) | <0.001 |
| Sepsis Shock           | 18(5.5%)                             | 35(16.4%)  | 16(37.2%) | <0.001 |
| Mortality              | 41(12.5%)                            | 61(28.6%)  | 23(53.5%) | <0.001 |

ICU: Intensive care unit.

Table 3S. Adverse outcome of patients categorized by simple sepsis early prognostic score among validation cohort.

| Variable               | Simple sepsis early prognostic score |           |           | P      |
|------------------------|--------------------------------------|-----------|-----------|--------|
|                        | Q1 (n=79)                            | Q2 (n=79) | Q3 (n=78) |        |
| ICU admissions         | 18(22.8%)                            | 26(32.9%) | 47(60.3%) | <0.001 |
| Mechanical ventilation | 20(25.3%)                            | 23(29.1%) | 53(67.9%) | <0.001 |
| Sepsis Shock           | 5(6.3%)                              | 9(11.4%)  | 25(32.1%) | <0.001 |
| Mortality              | 3(3.8%)                              | 11(13.9%) | 34(43.6%) | <0.001 |

ICU: Intensive care unit.
