# Supplementary figures and images for: Development and internal validation of a simple prognostic score for early sepsis risk stratification in the emergency department
Source: PubMed Central journal article supplement — BMJ Open. 2021 Jul 7;11(7):e046009. doi: 10.1136/bmjopen-2020-046009 (PMC8264891; doi:10.1136/bmjopen-2020-046009), 2021-07-07

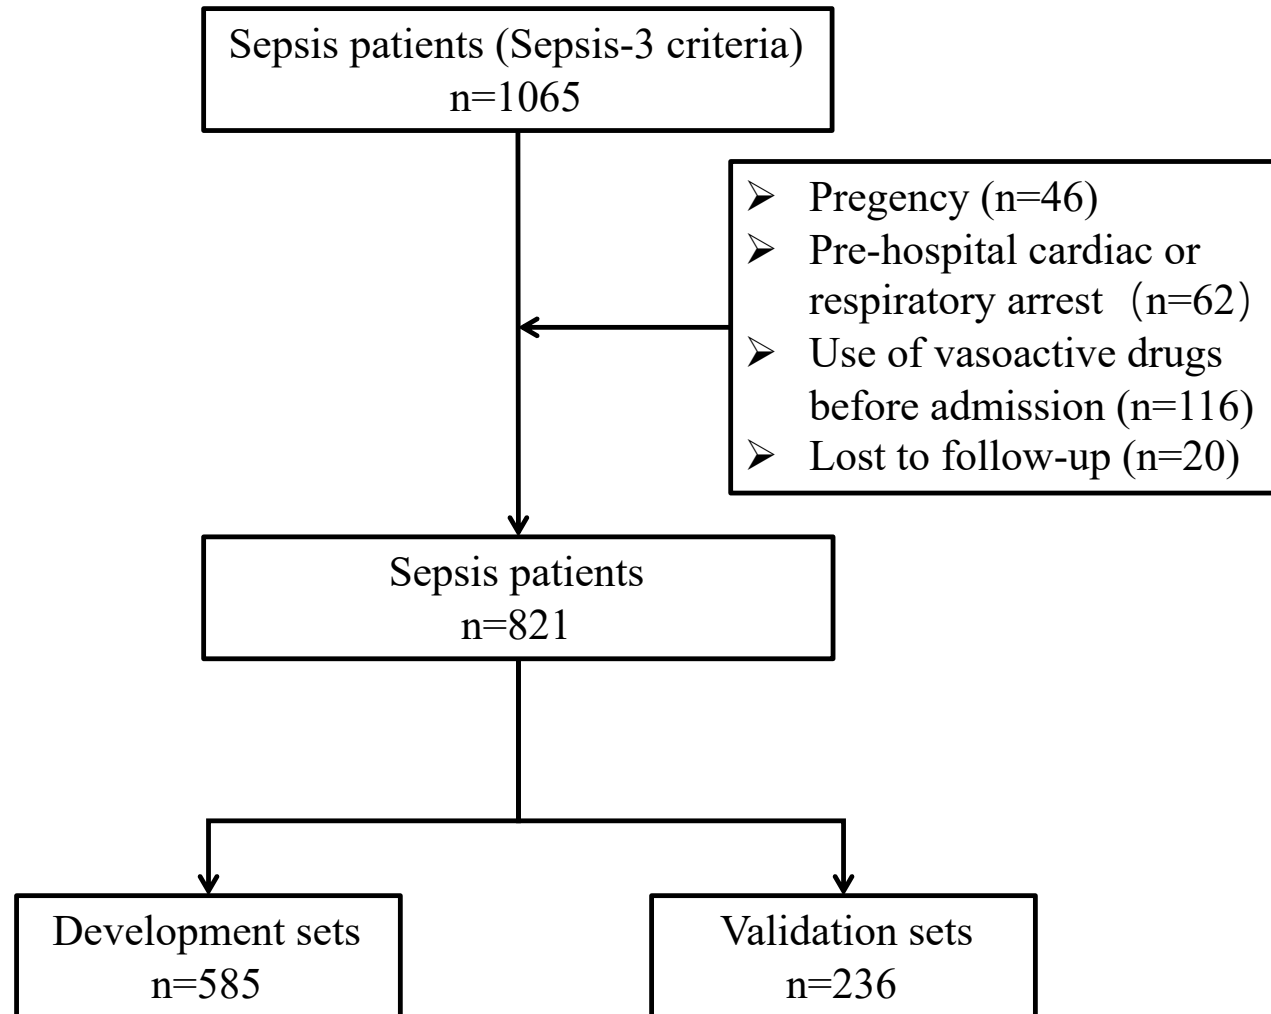

Figure 1S

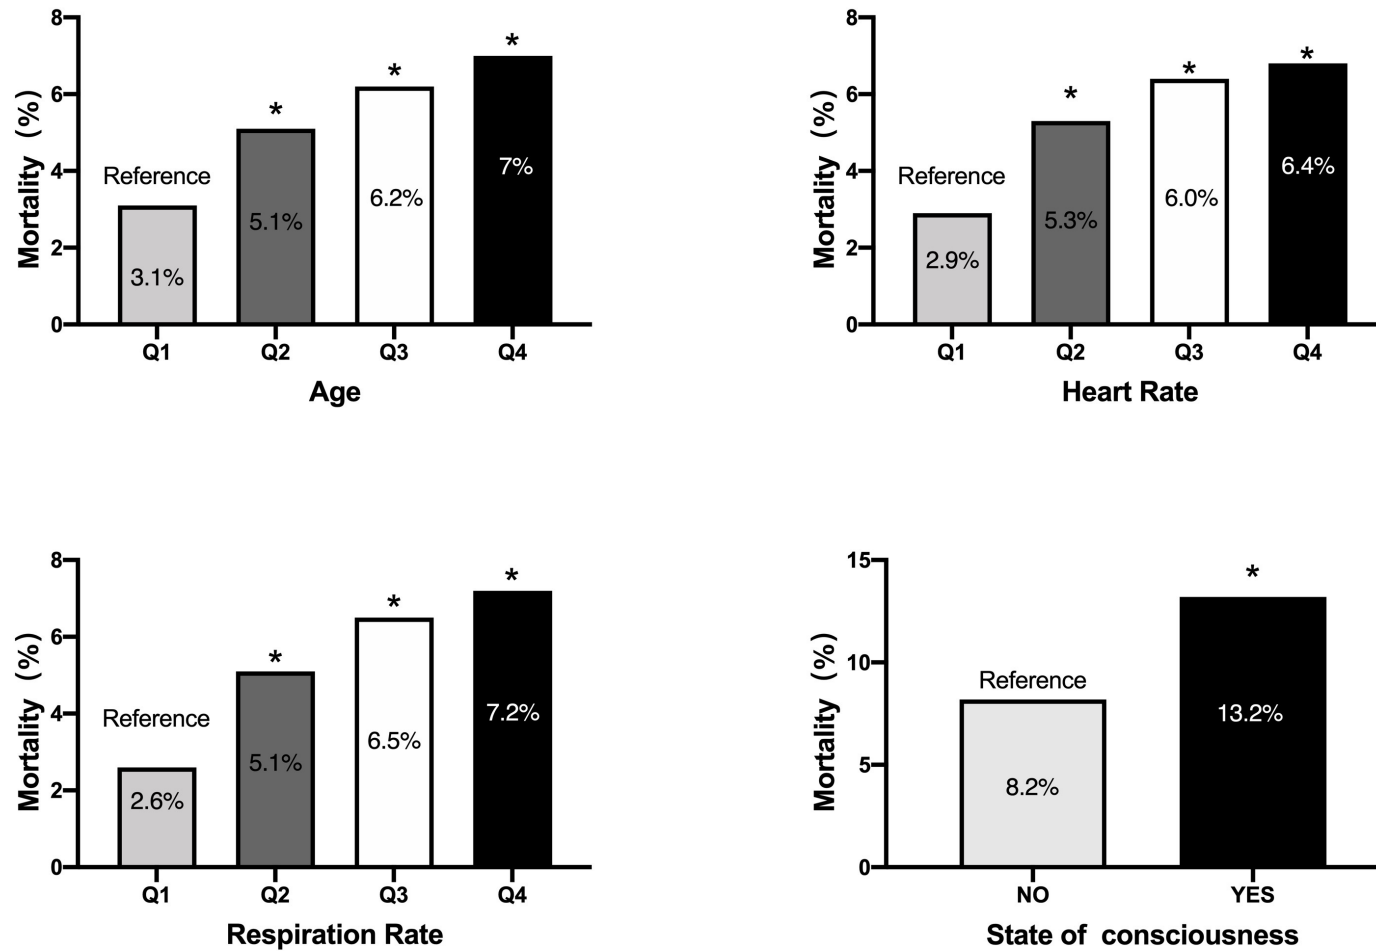

Figure 2S

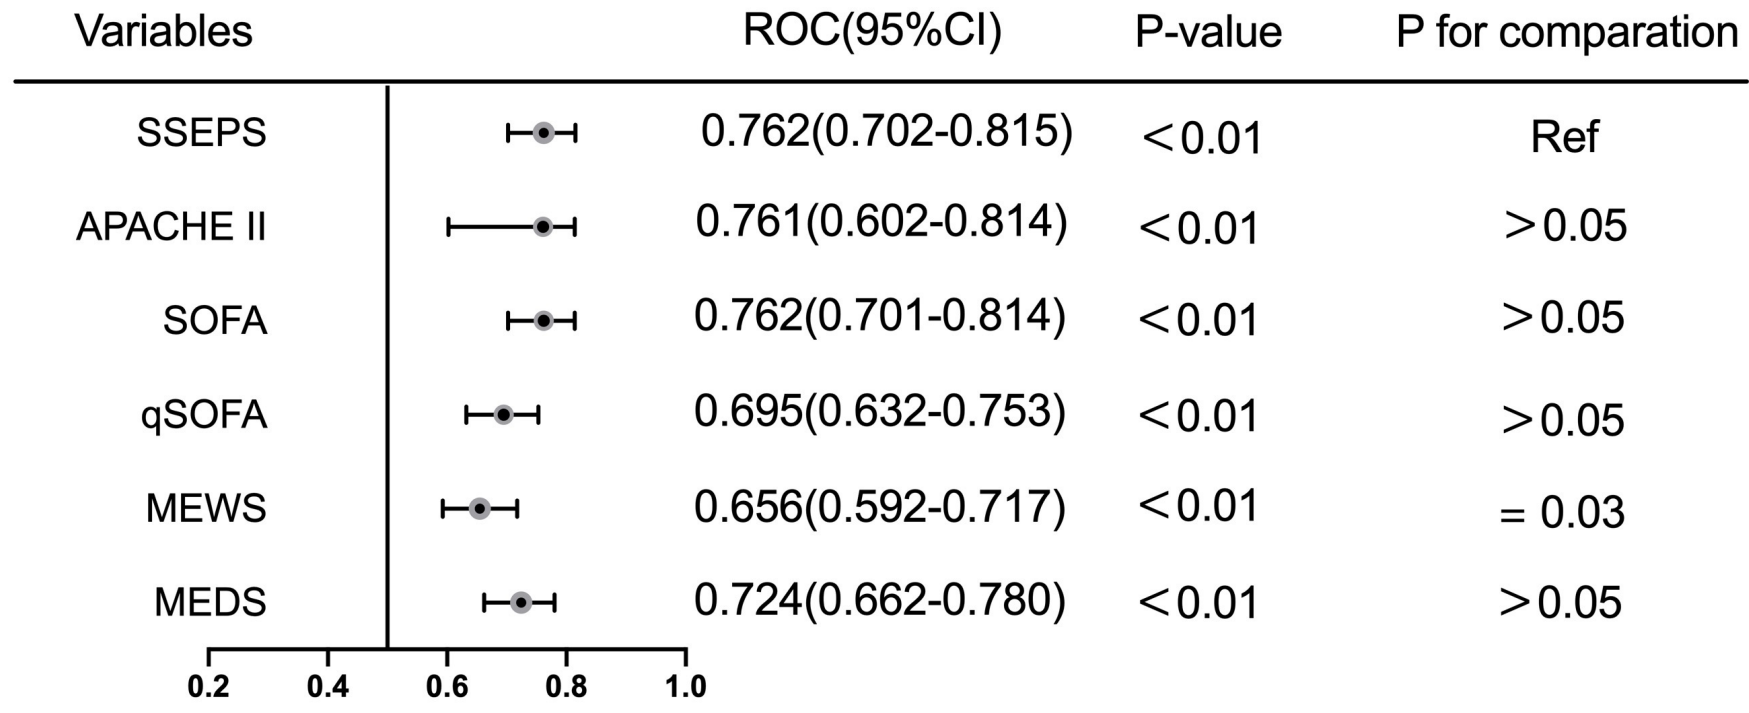

Figure 3S

Supplement: bmjopen-2020-046009supp001.pdf [file bmjopen-2020-046009supp001.pdf]
